# Supplementary material for: Complete chloroplast genome of Macadamia integrifolia confirms the position of the Gondwanan early-diverging eudicot family Proteaceae
Source: PubMed Central journal article supplement (PMC4290595; doi:10.1186/1471-2164-15-s9-s13), 2014-12-08

Contigs\_vs\_P\_occidentalis

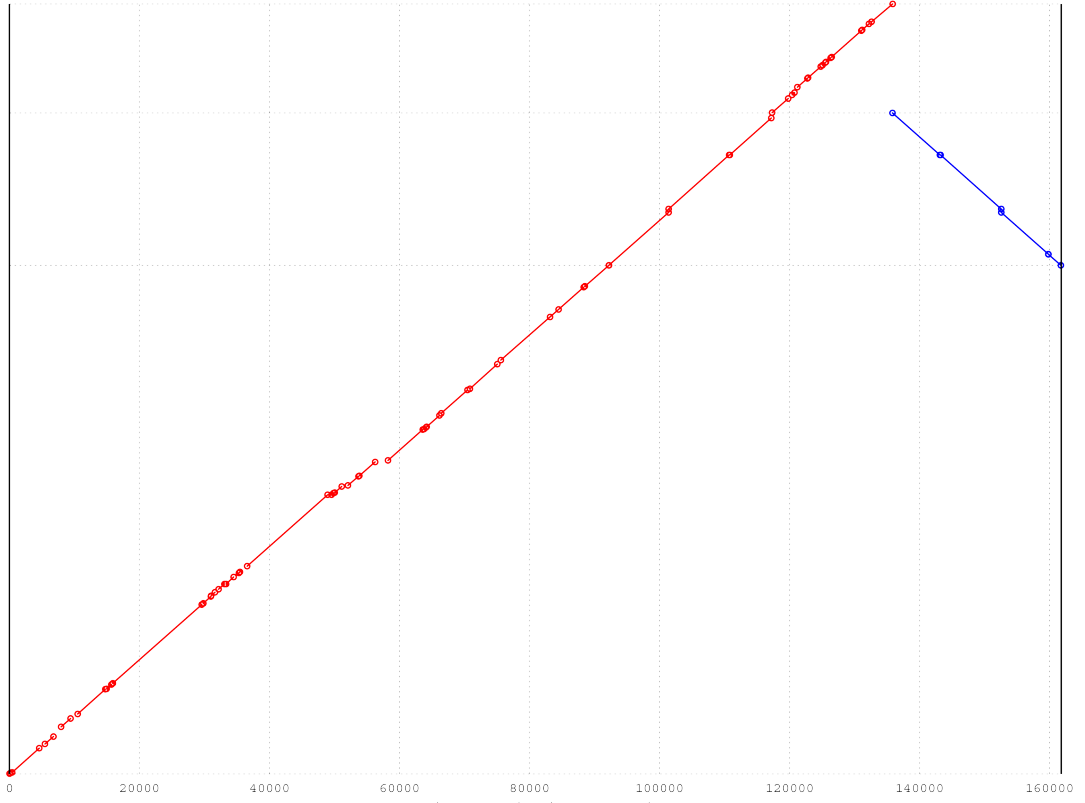

Supplement: 1471-2164-15-S9-S13-S1.pdf [file 1471-2164-15-S9-S13-S1.pdf]
